# Supplementary material for: Mutant Isocitrate Dehydrogenase 1 Expression Enhances Response of Gliomas to the Histone Deacetylase Inhibitor Belinostat
Source: MDPI journal article supplement (doi:10.3390/tomography9030077), 2023-05-04
Supplement: s1 [file s1]

Archive with 1 entries (1 files):
- tomography-2223559-supplementary.pdf
